# Supplementary material for: A Reduction in Ribonucleotide Reductase Activity Slows Down the Chromosome Replication Fork but Does Not Change Its Localization
Source: PubMed Central journal article supplement (PMC2773459; doi:10.1371/journal.pone.0007617), 2009-10-28
Supplement: pone.0007617.s003.pdf [file pone.0007617.s003.pdf]

**Table S1 Cell cycle parameters of cells grown with the indicated concentrations of HU.**

| mM HU | $\tau$ (min) | C  | D  | C+D |
|-------|--------------|----|----|-----|
| 0     | 27           | 49 | 27 | 76  |
| 2.5   | 27           | 56 | 23 | 79  |
| 5     | 27           | 62 | 19 | 81  |
| 10    | 30           | 82 | 15 | 97  |

The C+D period was determined from the initiation age, generation time and number of generations spanned by C+D as explained in legend to Figure S1. For cells grown without or in the presence of 5 mM HU C periods were obtained from Southern blot analysis and quantitative PCR, while the D periods were found from (C+D)-C. For cells grown in the presence of 2.5 and 10 mM HU, the C and D periods were obtained from theoretical simulation where the values of C and D that gave the best fit to the exponential histogram were chosen.
